# Supplementary material for: N-acetyl-L-tryptophan attenuates hepatic ischemia-reperfusion injury via regulating TLR4/NLRP3 signaling pathway in rats
Source: PeerJ. 2021 Aug 10;9:e11909. doi: 10.7717/peerj.11909 (PMC8362669; doi:10.7717/peerj.11909)
Supplement: Supplemental Information 1 — L-NAT alleviates hepatic ischemia-reperfusion injury. [file peerj-09-11909-s001.xlsx]

## Sheet: Sheet1
		Fig.1A	Suzuki				Fig.1B	ALT
		Sham	I/R	I/R+L-NAT			Sham	I/R	I/R+L-NAT
		0.6	3.8	1.6			90	840	450
		0.7	4.2	1.8			85	740	500
		0.8	4	2			100	780	480
	Average	0.7	4	1.8		Average	91.6667	786.667	476.667
	NLRP3	Fig.3A					Fig.3B					Fig.3C					Fig.3D					Fig.3E					Fig.3F
		Sham	I/R	I/R+L-NAT			Control	H2O2	H2O2+L-NAT			Sham	I/R	I/R+L-NAT			Control	H2O2	H2O2+L-NAT			Sham	I/R	I/R+L-NAT			Control	H2O2	H2O2+L-NAT
		1	8.44169	3.47016			1	3.5	2.5			0.8	1	0.83			0.25	0.7	0.4			23	54	31			23	83	28
		1	5.89708	1.87905			1	3.8	2			0.74	0.94	0.74			0.29	0.76	0.49			19	49	27			19	89	41
		1	6.8998	3.99821			1	3.2	1.4			0.83	1.05	0.7			0.18	0.62	0.31			35	67	45			31	75	36
	Average	1	7.07952	3.1158		Average	1	3.5	1.96667		Average	0.79	0.996667	0.756667		Average	0.24	0.693333	0.4		Average	25.6667	56.6667	34.3333		Average	24.3333	82.3333	35
	ASC	Fig.4A					Fig.4B					Fig.4C					Fig.4D					Fig.4E					Fig.4F
		Sham	I/R	I/R+L-NAT			Control	H2O2	H2O2+L-NAT			Sham	I/R	I/R+L-NAT			Control	H2O2	H2O2+L-NAT			Sham	I/R	I/R+L-NAT			Control	H2O2	H2O2+L-NAT
		1	1.5	1			1	4.4	3			0.8	1.9	1			0.55	0.9	0.58			21	88	41			11	86	29
		1	1.8	0.9			1	4	2.2			0.5	1.2	0.6			0.5	0.8	0.4			19	74	55			8	91	35
		1	1.4	0.93			1	3.6	2.5			0.6	1.5	0.8			0.45	0.7	0.35			29	71	35			18	82	42
	Average	1	1.56667	0.943333		Average	1	4	2.56667		Average	0.633333	1.53333	0.8		Average	0.5	0.8	0.443333		Average	23	77.6667	43.6667		Average	12.3333	86.3333	35.3333
	Caspase-1	Fig.5A					Fig.5B					Fig.5C					Fig.5D
		Control	H2O2	H2O2+L-NAT			Sham	I/R	I/R+L-NAT			Sham	I/R	I/R+L-NAT			Control	H2O2	H2O2+L-NAT
		1	2	1.4			1	6.1	2.2			21	75	42			41	87	62
		1	1.8	1.3			1	5.3	2			17	68	38			33	81	55
		1	1.5	1.1			1	4.8	1.8			30	79	55			48	94	66
	Average	1	1.76667	1.26667		Average	1	5.4	2		Average	22.6667	74	45		Average	40.6667	87.3333	61
	IL-1β	Fig.6A					Fig.6B					Fig.6C
		Control	H2O2	H2O2+L-NAT			Control	H2O2	H2O2+L-NAT			Control	H2O2	H2O2+L-NAT
		1	5	3.8			90	207.182	111.97			26	66	31
		0.8	6	4			69.0909	203.333	115.303			19	72	22
		1.2	6.9	4.1			71.93	206.18	114.753			29	59	27
	Average	1	5.96667	3.96667		Average	77.007	205.565	114.008		Average	24.6667	65.6667	26.6667
	TLR4	Fig.7A					Fig.7B					Fig.7C					Fig.7D					Fig.7E					Fig.7F
		Sham	I/R	I/R+L-NAT			Control	H2O2	H2O2+L-NAT			Sham	I/R	I/R+L-NAT			Control	H2O2	H2O2+L-NAT			Sham	I/R	I/R+L-NAT			Control	H2O2	H2O2+L-NAT
		1	5.21646	1.96905			1	1.8	0.9			0.2	0.58	0.3			0.23	0.68	0.41			31	66	35			31	68	41
		1	5.25977	0.913832			1	1.9	0.8			0.22	0.69	0.24			0.31	0.75	0.35			24	71	45			29	54	34
		1	5.179	1.29821			1	1.6	1			0.18	0.54	0.38			0.18	0.62	0.49			39	53	28			39	71	49
	Average	1	5.21841	1.3937		Average	1	1.76667	0.9		Average	0.2	0.603333	0.306667		Average	0.24	0.683333	0.416667		Average	31.3333	63.3333	36		Average	33	64.3333	41.3333
	NF-ΚB	Fig.8A					Fig.8B					Fig.8C					Fig.8D					Fig.8E					Fig.8F
		Sham	I/R	I/R+L-NAT			Control	H2O2	H2O2+L-NAT			Sham	I/R	I/R+L-NAT			Control	H2O2	H2O2+L-NAT			Sham	I/R	I/R+L-NAT			Control	H2O2	H2O2+L-NAT
		1	4.30198	1.46917			1	2.5	1.4			0.48	0.85	0.5			0.4	0.8	0.55			10	55	21			15	82	34
		1	6.20918	3.70635			1	2.6	1.2			0.42	0.88	0.43			0.37	0.89	0.61			15	62	17			21	89	42
		1	5.179	1.29821			1	2.2	1.1			0.46	0.75	0.58			0.45	0.72	0.49			9	44	32			31	77	29
	Average	1	5.23005	2.15791		Average	1	2.43333	1.23333		Average	0.453333	0.826667	0.503333		Average	0.406667	0.803333	0.55		Average	11.3333	53.6667	23.3333		Average	22.3333	82.6667	35
	Ratio of liver weight to body weight						Cell viability
		Sham	I/R	I/R+L-NAT			Sham	I/R	I/R+L-NAT
		3.12	5.97	3.43			1.02	0.44	0.94
		3.84	6.25	3.97			1.21	0.38	0.76
		2.96	6.64	4.62			0.84	0.51	0.82
